# Supplementary material for: Nanotechnology in Food and Plant Science: Challenges and Future Prospects
Source: MDPI journal article supplement (doi:10.3390/plants12132565), 2023-07-06
Supplement: s1 [file s1]

**Supplementary Table S1. nanoparticles employed for the detection of foodborne pathogens**

| Nanoparticles                         | Pathogens                                                                                        | Detection limit                                          | Ref     |
|---------------------------------------|--------------------------------------------------------------------------------------------------|----------------------------------------------------------|---------|
| Magnetic bead/quantum dot             | <i>E. coli</i> O157:H7                                                                           | 10 <sup>3</sup> CFU/mL                                   | 232     |
| Magnetic nanoparticle                 | <i>E. coli</i> O157:H7, <i>S. aureus</i> , <i>S. epidermidis</i>                                 | 10 <sup>4</sup> CFU/mL, 8 CFU/mL, 10 <sup>3</sup> CFU/mL | 233     |
| Immunomagnetic liposome nanoparticle  | <i>Cronobacter sakazakii</i>                                                                     | 10 <sup>3</sup> CFU/mL                                   | 234     |
| RuBpy doped silica                    | <i>E. coli</i> O157:H7                                                                           | 1 cell/mL                                                | 232,235 |
| Liposome nanoparticles                | <i>Salmonella typhimurium</i>                                                                    | 10 <sup>2</sup> CFU/mL                                   | 236     |
| Aptamer conjugated gold nanoparticles | <i>S. typhimurium</i>                                                                            | 10 <sup>4</sup> CFU/mL                                   | 237,238 |
| Quantum dot                           | <i>Salmonella enterica</i> serotype Typhi, <i>E. coli</i> O157:H7, <i>Listeria monocytogenes</i> | 103–106 cells/ml                                         | 239-242 |
| Single walled carbon nanotube         | <i>E. coli</i>                                                                                   | NA                                                       | 233     |
| Gold/silicon nanorod                  | <i>Salmonella enterica</i> serotype Typhi; Respiratory syncytial virus                           | Not reported                                             | 243     |
| Gold nanorod                          | <i>E. coli</i> O157:H7                                                                           | 1-10 CFU/mL                                              | 244     |
| Gold nanoparticle                     | <i>Salmonella enterica</i> serotype Typhi                                                        | 98.9 CFU/mL                                              | 245     |

**Supplementary Table S2. Nanomaterial-based biosensors applied in food science and food nanotechnology**

| Sensor type     | Nanomaterial                                         | Sample                      | Analyte                                                           | Function                                                                           | Ref. |
|-----------------|------------------------------------------------------|-----------------------------|-------------------------------------------------------------------|------------------------------------------------------------------------------------|------|
| Electrochemical | CuO nanostructure                                    | Cabbage and spinach extract | Residual pesticides (chlorpyrifos, fenthion and methyl parathion) | Surface area enhancement                                                           | 246  |
|                 | AuNPs label                                          | Skimmed milk                | Pathogens ( <i>Salmonella</i> )                                   | Electrochemical signal generation                                                  | 247  |
|                 | AuNPs electrodeposited on GCE                        | Edible oils                 | Antioxidants ((BHA), (BHT) and (TBHQ))                            | Improved conductivity due to surface area enlargement and increase of active sites | 248  |
|                 | Cd QDs encapsulated in ZIF-8 metal organic framework | Milk                        | Pathogens ( <i>E. coli</i> O157:H7)                               | Electrochemical signal generation due to Cd etching to Cd(II)                      | 249  |
|                 | TiO <sub>2</sub> /CeO <sub>2</sub> NPs               | <i>In vivo</i> rat brain    | Adulterants (dopamine)                                            | Enhanced sensitivity                                                               | 250  |
|                 | Graphene nano ribbons (GNR)                          | Fruit juice                 | Antioxidants (ascorbic acid)                                      | Enhanced surface area and electrochemical properties                               | 251  |
|                 | Graphene-Cu NPs                                      | Banana and bovine milk      | Mannitol, sucrose, lactose, glucose, and fructose                 | Oxidation of carbohydrate                                                          | 252  |
|                 |                                                      | —                           | Mannitol, sucrose, glucose, and fructose                          | CNTS provided high surface area. Cu NPs enabled oxidation of carbohydrate          | 253  |
|                 | PtNPs                                                | Soil and water              | Residual pesticides (paraoxon)                                    | Surface area, conductivity and enzyme loading enhancement                          | 254  |

|         |                                                                              |                            |                                                                                                                 |                                                                                                                          |          |
|---------|------------------------------------------------------------------------------|----------------------------|-----------------------------------------------------------------------------------------------------------------|--------------------------------------------------------------------------------------------------------------------------|----------|
|         | AuNPs loaded on MWCNT                                                        | Milk                       | Toxins (BPA)                                                                                                    | Enhanced surface area and conductivity                                                                                   | 255      |
|         | MWCNT                                                                        | Baby feeding bottles       | Toxins (BPA)                                                                                                    | Conductive and functionalizable layer                                                                                    | 256      |
|         | -GNRs/GO-Pd/Au core-shell nanocrystallines (Pd/Au CSNs)<br><br>-CdSe@CdS QDs | Tomato sauce               | Adulterants, Sudan I                                                                                            | GO provided a matrix for antibody immobilization. GNRs/ GO enhanced the surface area thus enhanced the signal generation | 257      |
|         |                                                                              | Chili sauce                |                                                                                                                 |                                                                                                                          |          |
|         |                                                                              | Chili powder               |                                                                                                                 | Pd/Au CSNs provides catalytic activity and high surface area                                                             |          |
|         | GODs-AuNPs                                                                   | —                          | Heavy metals ( $\text{Hg}^{2+}$ , $\text{Cu}^{2+}$ )                                                            | Preconcentration                                                                                                         | 258      |
|         | GSH@Fe <sub>3</sub> O <sub>4</sub>                                           | Water                      | Heavy metals ( $\text{Pb}^{2+}$ , $\text{Cd}^{2+}$ )                                                            | Preconcentration                                                                                                         | 259      |
| Optical | SWCNTs gold                                                                  | Water                      | Heavy metals ( $\text{Hg}^{2+}$ )                                                                               | Provides a high surface area of thiophenol- modified SWCNTs gold electrode                                               | 260      |
|         | CeO <sub>2</sub> NPs                                                         | Tea and medicinal mushroom | Antioxidants (ascorbic acid, gallic acid, vanillic acid, quercetin, caffeic acid, and epigallocatechin gallate) | Catalytic activity                                                                                                       | 261      |
|         | CeO <sub>2</sub> NPs                                                         | Aqueous media and serum    | Adulterants (dopamine)                                                                                          | Colorimetric signal                                                                                                      | 262, 263 |

|  |                                           |                                 |                                                                        |                                                                          |     |
|--|-------------------------------------------|---------------------------------|------------------------------------------------------------------------|--------------------------------------------------------------------------|-----|
|  | CeO <sub>2</sub> NPs                      | Milk                            | Mycotoxin (ochratoxinA)                                                | Catalytic activity                                                       | 264 |
|  | AuNPs                                     | Milk powder                     | Adulterants (melamine)                                                 | SPR optical properties                                                   | 265 |
|  | Au nanocolloid                            | Tomato sauce and chili powder   | Adulterants, Sudan I                                                   | Visible colorimetric signal on nitrocellulose strip                      | 266 |
|  | Au nanocage                               | Green tea                       | Antioxidants (gallic acid)                                             | Morphological change induces LSPR change upon seed-mediated growth of Ag | 267 |
|  | MnO <sub>2</sub> nanosheets               | Orange and orange juice         | Antioxidants (ascorbic acid)                                           | Catalytic activity                                                       | 268 |
|  | Nitrogen-doped carbon dots                | —                               | Heavy metals (Hg <sup>2+</sup> , Cu <sup>2+</sup> , Fe <sup>3+</sup> ) | Fluorescent response                                                     | 269 |
|  | DNA–AuNPs                                 | —                               | Heavy metals (Hg <sup>2+</sup> )                                       | Colorimetric response due to aggregation                                 | 270 |
|  | AuNPs                                     | Cucumber and hamburger extracts | Pathogens ( <i>E. coli</i> and <i>Salmonella</i> sp.)                  | SPR optical properties                                                   | 271 |
|  | Au@AgNPs                                  | Milk                            | Antibiotics (kanamycin)                                                | SERS activity                                                            | 272 |
|  | AuNR MnFe <sub>2</sub> O <sub>4</sub> @Au | —                               | Pathogens ( <i>S. aureus</i> )                                         | SERS activity Separation                                                 | 273 |
|  | AuNPs                                     | Honey                           | Antibiotics (26 sulfonamides)                                          | —                                                                        | 274 |

## References

- [232] Yang L, Li Y. Quantum dot bioconjugates for simultaneous detection of Escherichia coli O157:H7 and Salmonella Typhimurium. *Analyst* 2006;131:394e401.
- [233] Zhao X, Hilliard L, Mechery S, Wang Y, Bagwe R, Jin S. A rapid bioassay for single bacterial cell quantitation using bioconjugated nanoparticles. *Proc Natl Acad Sci USA*. 2004;42:15027e32.
- [234] Shukla S, Lee G, Song X, Park S, Kim M. Immunoliposomebased immunomagnetic concentration and separation assay for rapid detection of Cronobacter sakazakii. *Biosens Bioelectron* 2016;77:986e94.
- [235] Su SL, Li Y. Quantum dot biolabeling coupled with immunomagnetic separation for detection of Escherichia coli O157:H7. *Anal Chem* 2004;76(16):4806e10.
- [236] Zhou L, Lv S, He G, He Q, Shi BI. Effect of PE/AG2O nanopackaging on the quality of apple slices. *J Food Qual* 2011;34(3):171e6.
- [237] Oh SY, Heo NS, Shukla S, Cho HY, Ezhil Vilian AT, Kim J et al. Development of gold nanoparticle aptamer-based LSPR sensing chips for the rapid detection of Salmonella typhimurium in pork meat. *Sci Rep* 2017;7:e10130.
- [238] De Souza Reboucas J, Esparza I, Ferrer M, Sanz ML, Irache JM, Gamazo C. Nanoparticulate adjuvants and delivery systems for allergen immunotherapy. *J Biomed Biotechnol* 2012:e474605.
- [239] Hahn MA, Keng PC, Krauss TD. Flow cytometric analysis to detect pathogens in bacterial cell mixtures using semiconductor quantum dots. *Anal Chem* 2008;3:864e72.
- [240] Yang L, Li Y. Quantum dots as fluorescent labels for quantitative detection of S. typhimurium in chicken carcass wash water. *J Food Protect* 2005;6:1241e5.
- [241] Tully E, Hearty S, Leonard P, O'Kennedy R. The development of rapid fluorescence-based immunoassays, using quantum dot-labelled antibodies for the detection of L. monocytogenes cell surface proteins. *Int J Biol Macromol* 2006;1e3:127e34.
- [242] Wang C, Irudayaraj J. Gold nanorod probes for the detection of multiple pathogens. *Small* 2008;12:2204e8.
- [243] Dungchai W, Siangproh W, Chaicumpa W, Tongtawe P, Chailapakul O. S. typhi determination using voltametric amplification of nanoparticles: a highly sensitive strategy for metalloimmunoassay based on a copper-enhanced gold label. *Talanta* 2008;2:727e32.
- [244] Fu J, Park B, Siragusa G, Jones L, Tripp R, Zhao Y. An Au/Si hetero-nanorod-based biosensor for Salmonella detection. *Nanotechnology* 2008;15:e155502.
- [245] Vikesland PJ, Wigginton KR. Nanomaterial enabled biosensors for pathogen monitoring e a review. *Environ Sci Technol* 2010;10:3656e69.
- [246] M. M. Tunesi, et al., Functionalised CuO nanostructures for the detection of organophosphorus pesticides: a non- enzymatic inhibition approach coupled with nano-scale electrode engineering to improve electrode sensitivity, *Sens. Actuators, B*, 2018, 260, 480–489.
- [247] A. S. Afonso, et al., Electrochemical detection of Salmonella using gold nanoparticles, *Biosens. Bioelectron.*, 2013, 40(1), 121–126.
- [248] X. Lin, Y. Ni and S. Kokot, Glassy carbon electrodes modified with gold nanoparticles for the simultaneous determination of three food antioxidants, *Anal. Chim. Acta*, 2013, 765, 54–62.
- [249] M. Zhong, et al., An electrochemical immunobiosensor for ultrasensitive detection of Escherichia coli O157:H7 using CdS quantum dots-encapsulated metal-organic frameworks as signal-amplifying tags, *Biosens. Bioelectron.*, 2019, 126, 493–500.
- [250] J. Njagi, et al., Amperometric detection of dopamine in vivo with an enzyme based carbon fiber microbiosensor, *Anal. Chem.*, 2010, 82(3), 989–996.
- [251] Y. Yang, et al., Electrochemical evaluation of total antioxidant capacities in fruit juice based on the guanine/ graphene nanoribbon/glassy carbon electrode, *Talanta*, 2013, 106, 206–211.
- [252] Q. Chen, L. Zhang and G. Chen, Facile preparation of graphene-copper nanoparticle composite by in situ chemical reduction for electrochemical sensing of carbohydrates, *Anal. Chem.*, 2012, 84(1), 171–178.

- [253] Y. Fu, L. Zhang and G. Chen, Preparation of a carbon nanotube-copper nanoparticle hybrid by chemical reduction for use in the electrochemical sensing of carbohydrates, *Carbon*, 2012, 50(7), 2563–2570.
- [254] J. A. Hondred, et al., Printed graphene electrochemical biosensors fabricated by inkjet maskless lithography for rapid and sensitive detection of organophosphates, *ACS Appl. Mater. Interfaces*, 2018, 10(13), 11125–11134.
- [255] N. B. Messaoud, et al., Electrochemical sensor based on multiwalled carbon nanotube and gold nanoparticle modified electrode for the sensitive detection of bisphenol A, *Sens. Actuators, B*, 2017, 253, 513–522.
- [256] T. Anirudhan, V. Athira and V. C. Sekhar, Electrochemical sensing and nano molar level detection of Bisphenol-A with molecularly imprinted polymer tailored on multiwalled carbon nanotubes, *Polymer*, 2018, 146, 312–320.
- [257] C. Wang, et al., Multiple signal amplification electrochemiluminescent immunoassay for Sudan I using gold nanorods functionalized graphene oxide and palladium/aurum core-shell nanocrystallines as labels, *Electrochim. Acta*, 2018, 278, 352–362.
- [258] S. L. Ting, et al., Graphene quantum dots functionalized gold nanoparticles for sensitive electrochemical detection of heavy metal ions, *Electrochim. Acta*, 2015, 172, 7–11.
- [259] M. Baghayeri, et al., A simple approach for simultaneous detection of cadmium (II) and lead (II) based on glutathione coated magnetic nanoparticles as a highly selective electrochemical probe, *Sens. Actuators, B*, 2018, 273, 1442–1450.
- [260] J. Wei, et al., Stripping voltammetric determination of mercury (II) based on SWCNT-PhSH modified gold electrode, *Sens. Actuators, B*, 2014, 190, 968–974.
- [261] E. Sharpe, et al., Portable ceria nanoparticle-based assay for rapid detection of food antioxidants (NanoCerac), *Analyst*, 2013, 138(1), 249–262.
- [262] A. Hayat, et al., Redox reactivity of cerium oxide nanoparticles against dopamine, *J. Colloid Interface Sci.*, 2014, 418, 240–245.
- [263] G. Bu'lbul, et al., Reactivity of nanoceria particles exposed to biologically relevant catechol-containing molecules, *RSC Adv.*, 2016, 6(65), 60007–60014.
- [264] G. Bu'lbul, A. Hayat and S. Andreescu, ssDNA-Functionalized Nanoceria: A Redox-Active Aptaswitch for Biomolecular Recognition, *Adv. Healthcare Mater.*, 2016, 5(7), 822–828.
- [265] S. Y. Oh, et al., Cuvette-Type LSPR Sensor for Highly Sensitive Detection of Melamine in Infant Formulas, *Sensors*, 2019, 19(18), 3839.
- [266] J. Wang, et al., Nanocolloidal gold-based immuno-dip strip assay for rapid detection of Sudan red I in food samples, *Food Chem.*, 2013, 136(3–4), 1478–1483.
- [267] Y. Wang, et al., Morphological control of nanoprobe for colorimetric antioxidant detection, *Biosens. Bioelectron.*, 2018, 122, 183–188.
- [268] L. He, et al., Rapid and sensitive colorimetric detection of ascorbic acid in food based on the intrinsic oxidase-like activity of MnO<sub>2</sub> nanosheets, *Luminescence*, 2018, 33(1), 145–152.
- [269] Z. Wang, et al., Fluorescence sensor array based on amino acid derived carbon dots for pattern-based detection of toxic metal ions, *Sens. Actuators, B*, 2017, 241, 1324–1330.

- [270] J. S. Lee, M. S. Han and C. A. Mirkin, Colorimetric detection of mercuric ion ( $\text{Hg}^{2+}$ ) in aqueous media using DNA-functionalized gold nanoparticles, *Angew. Chem., Int. Ed.*, 2007, 46(22), 4093–4096.
- [271] H. Vaisocherov'a-L'isalov'a, et al., Low-fouling surface plasmon resonance biosensor for multi-step detection of foodborne bacterial pathogens in complex food samples, *Biosens. Bioelectron.*, 2016, 80, 84–90.
- [272] Y. Jiang, et al., Ultrasensitive analysis of kanamycin residue in milk by SERS-based aptasensor, *Talanta*, 2019, 197, 151–158.
- [273] J. Wang, et al., Facile synthesis of Au-coated magnetic nanoparticles and their application in bacteria detection via a SERS method, *ACS Appl. Mater. Interfaces*, 2016, 8(31), 19958–19967.
- [274] Y. Chen, et al., Gold immunochromatographic sensor for the rapid detection of twenty-six sulfonamides in foods, *Nano Res.*, 2017, 10(8), 2833–2844.
